# Supplementary material for: The role of oxygen adsorption and gas sensing mechanism for cerium vanadate (CeVO4) nanorods
Source: Royal Society of Chemistry journal article supplement (doi:10.1039/c5ra20049k), 2016-01-01
Supplement: c5ra20049k1.pdf [file c5ra20049k1.pdf]

**A role of oxygen adsorption and gas sensing mechanism for cerium vanadate  
(CeVO<sub>4</sub>) nanorods**

Jimin Hou,<sup>a</sup> Huihan Huang,<sup>a</sup> Zhizhong Han<sup>b</sup> and Haibo Pan<sup>\*ac</sup>

<sup>a</sup>*College of Chemistry, Qishan Campus, Fuzhou University, Fuzhou, Fujian 350108, China*

<sup>b</sup>*School of Pharmacy, Fujian Medical University, Fuzhou, Fujian 350108, China*

<sup>c</sup>*Fujian Key Lab of Medical Instrument and Pharmaceutical Technology, Fuzhou University,  
Fuzhou, Fujian 350002, China*

*\*Corresponding authors*

*Telephone: 86-591- 22866127; Fax: 86-591-22866127*

*E-mail: hbpan@fzu.edu.cn (H. Pan)*

Fig. S1

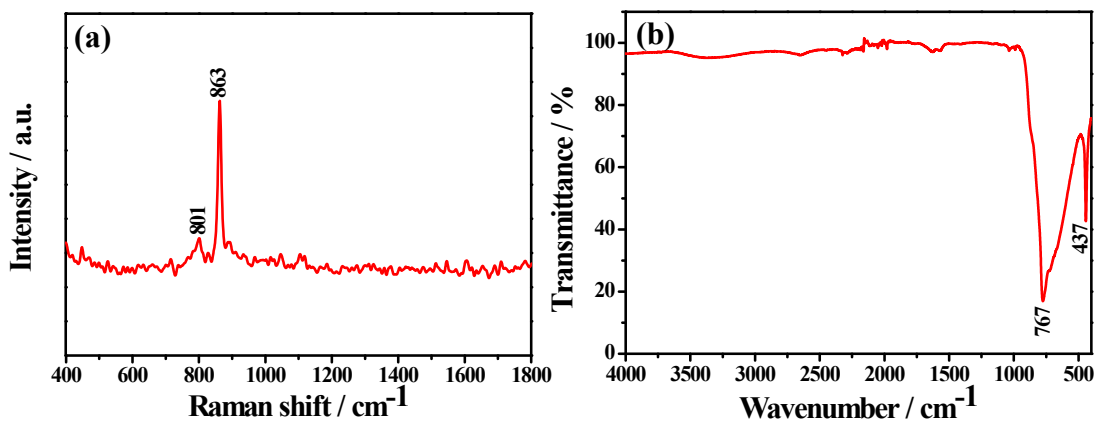

Fig. S1 Raman spectrum (a) and IR transmission spectrum (b) of  $\text{CeVO}_4$  NRs.

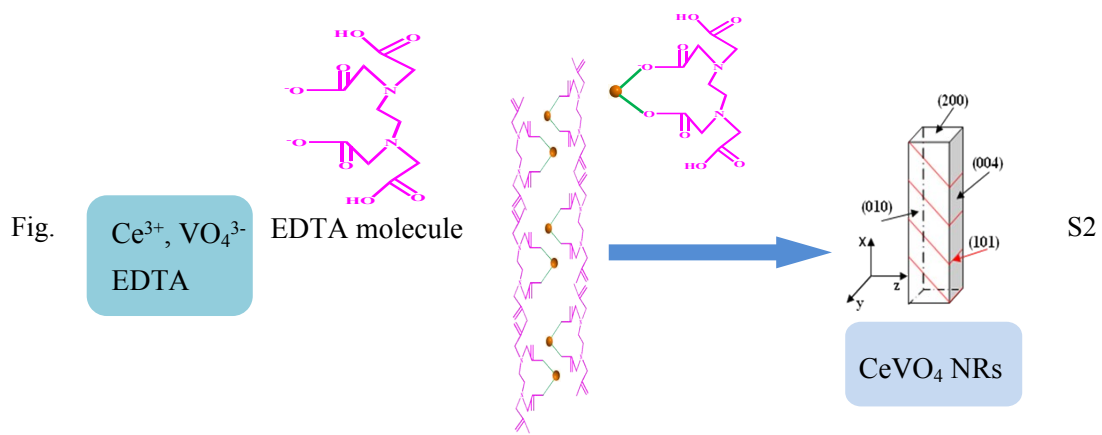

Fig. S2 Schematic growth mechanism in CeVO<sub>4</sub> NRs.

Fig. S3

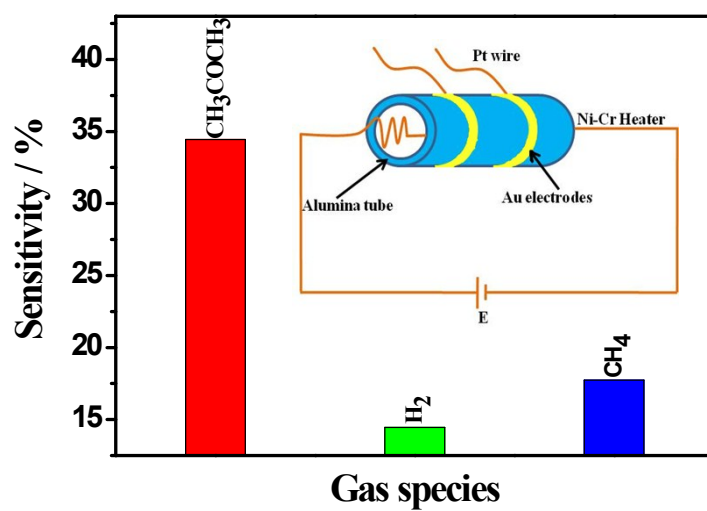

Fig. S3 Sensitivity of CeVO<sub>4</sub> NRs gas sensor to different gases at 5V (108 °C) (the inset is the gas sensor).

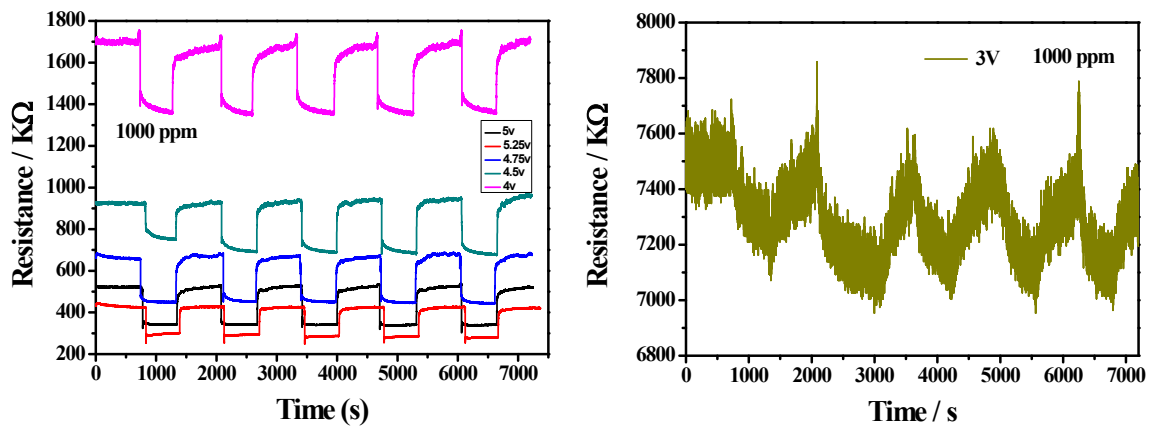

Fig. S4 Sensing behavior of  $CeVO_4$  NRs gas sensor to acetone gas at different voltages.

Fig. S5

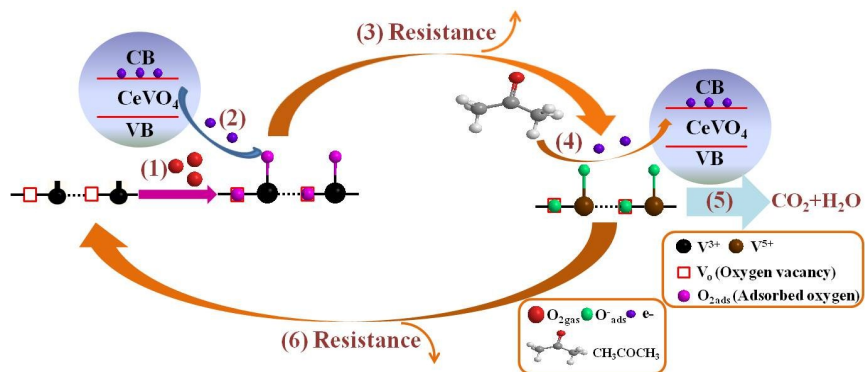

Fig. S5 Schematic illustration of gas-sensing process for  $\text{CeVO}_4$  NRs.
